1 **Exploring the limits of network topology estimation using diffusion-based**  
2 **tractography and tracer studies in the macaque cortex**

3 **Kelly Shen<sup>a</sup>, Alexandros Goulas<sup>b</sup>, David Grayson<sup>c</sup>, John Eusebio<sup>a</sup>, Joseph S. Gati<sup>d</sup>, Ravi S.**  
4 **Menon<sup>d,e</sup>, Anthony R. McIntosh<sup>a,f</sup>, and Stefan Everling<sup>d,e</sup>**

5 <sup>a</sup>Rotman Research Institute, Baycrest, Toronto, Ontario, Canada

6 <sup>b</sup>Department of Computational Neuroscience, University Medical Center Hamburg-Eppendorf,  
7 Hamburg, Germany

8 <sup>c</sup>UC Davis

9 <sup>d</sup>The Centre for Functional and Metabolic Mapping, and

10 <sup>e</sup>Department of Physiology and Pharmacology, University of Western Ontario, London, Ontario,  
11 Canada

12 <sup>f</sup>Department of Psychology, University of Toronto, Toronto, Ontario, Canada

## 13 **Abstract**

14 Reconstructing the anatomical pathways of the brain to study the human connectome has become  
15 an important endeavour for understanding brain function and dynamics. Reconstruction of the  
16 cortico-cortical connectivity matrix *in vivo* often relies on noninvasive diffusion-weighted imaging  
17 (DWI) techniques but the extent to which they can accurately represent the topological  
18 characteristics of structural connectomes remains unknown. We explored this question by  
19 constructing connectomes using DWI data collected from macaque monkeys *in vivo* and with data  
20 from published invasive tracer studies. We found the strength of fiber tracts was well estimated  
21 from DWI and topological properties like degree and modularity were captured by tractography-  
22 based connectomes. Rich-club/core-periphery type architecture could also be detected but the  
23 classification of hubs using betweenness centrality, participation coefficient and core-periphery  
24 identification techniques was inaccurate. Our findings indicate that certain aspects of cortical  
25 topology can be faithfully represented in noninvasively-obtained connectomes while other  
26 network analytic measures warrant cautionary interpretations.

27

## 28 **Introduction**

29 Network structure is thought to play a prominent role in supporting healthy brain function (Griffa  
30 et al., 2013; Fornito et al., 2015). Indeed, a large body of work has been devoted to the analysis of  
31 the brain's structural topology in order to characterize and infer how functional networks emerge  
32 from large-scale structural connectivity, or the "connectome" (Park and Friston, 2013; Sporns,  
33 2014; Zuo et al., 2016). In humans, the characterization of network structure relies mainly on  
34 noninvasive techniques such as tractography using diffusion-weighted magnetic resonance  
35 imaging (DWI). A number of influential observations about brain organization in both health and  
36 disease have been made based on DWI data (e.g., van den Heuvel et al., 2010; van den Heuvel and  
37 Sporns, 2011; Zalesky et al., 2011; Crossley et al., 2014; Perry et al., 2015; Baum et al., 2017).  
38 Recent validation studies in the macaque have demonstrated how a general correspondence exists  
39 between DWI-based estimates of structural connectivity, specifically "connection strength"  
40 (usually taken as some derivative of the number of streamlines between two regions), and those  
41 derived from the gold standard invasive technique of using tract tracers to map axonal  
42 projections. DWI-based tractography has been shown to correctly detect the presence of a large  
43 proportion of connections across the visual system (Azadbakht et al., 2015) and DWI-based  
44 estimates of connection strengths are correlated to those obtained from tracer studies (van den  
45 Heuvel et al., 2015; Donahue et al., 2016). However, even with extremely high-resolution DWI,  
46 probabilistic tractography suffers from a steep trade-off between sensitivity and specificity  
47 whereby obtaining a large proportion of true positive connections is accompanied by a large  
48 number of false positives and the optimal parameter settings for tractography (e.g., curvature  
49 thresholds) can vary widely depending on the location of the seed (Thomas et al., 2014; also see  
50 Maier-Hein et al., 2017). The ability of tractography to properly reconstruct the connectivity of the

51 human brain and, in particular, the interpretation of detected streamlines (Jones et al., 2013),  
52 remains a matter of debate.

53 Existing validation studies in the macaque have only examined the accuracy of DWI-based  
54 tractography at the level of the individual connection. However, a major use of tractography has  
55 been to study the human brain at the level of large-scale whole-brain networks. The extent to  
56 which tractography can accurately capture the brain's structural topology remains unknown.  
57 While some studies have shown that connectomes generated from tracer studies exhibit similar  
58 network organization principles as those reported using DWI data (e.g., Harriger et al., 2012; de  
59 Reus and van den Heuvel, 2013a), it is still unclear whether the topologies of networks obtained  
60 from the two different modalities actually coincide. Most previous studies have also been limited  
61 to tractography within a single hemisphere and usually using only a few *ex vivo* specimens, where  
62 DWI scans are of optimal quality and are not affected by artifacts such as motion or physiological  
63 noise. In this study, we used DWI data obtained from 10 macaque monkeys in combination with  
64 macaque connectivity described by published tracer studies to determine whether probabilistic  
65 tractography can accurately represent whole-brain structural topology *in vivo*. Given that  
66 tractography's accuracy varies greatly as a function of its parameter settings (Dauguet et al., 2007;  
67 Jones et al., 2013; Thomas et al., 2014), we first systematically varied tractography parameters to  
68 determine the optimal settings for constructing whole-brain connectomes in the macaque. Using  
69 these optimized connectomes in conjunction with network analytic tools, we then determined the  
70 extent to which connectomes derived from DWI accurately captured the structural network  
71 characteristics of the macaque brain. We replicate previous findings that tractography can detect  
72 the presence and/or absence of connections above chance levels and can also provide reasonable  
73 estimates of connection strengths. In the macaque, more accurate connectomes were obtained by  
74 lowering the curvature threshold and discarding a small percentage of the weakest connections.

75 However, owing to the high false positive rates in tractography-based connectomes, their ability to  
76 accurately capture critical aspects of structural topology was dependent on the robustness of the  
77 network analytic measure in question to misidentified connections.

## 78 Results

79 Probabilistic tractography was performed using an FSL-based pipeline on diffusion-weighted  
80 magnetic resonance imaging data collected from 10 macaque monkeys at 7T. Two different  
81 parcellations, a single-hemisphere one (“Markov-Kennedy” (Markov et al., 2014)) and a whole-  
82 cortex parcellation (“RM-CoCo” (Kötter and Wanke, 2005; Bezgin et al., 2012)) were used and  
83 tractography parameters (angular threshold and distance correction) were systematically varied  
84 (see Materials and Methods). Tractography-derived connectivity matrices for various parameter  
85 combinations for an example subject are shown alongside the tracer-derived matrices in Figure 1.  
86 For the purposes of this paper, we use the term connection “strength” to refer to the number or  
87 proportion of axons running between two regions in the case of tract tracing data and the number  
88 or proportion of streamlines running between two regions for DWI-based tractography.

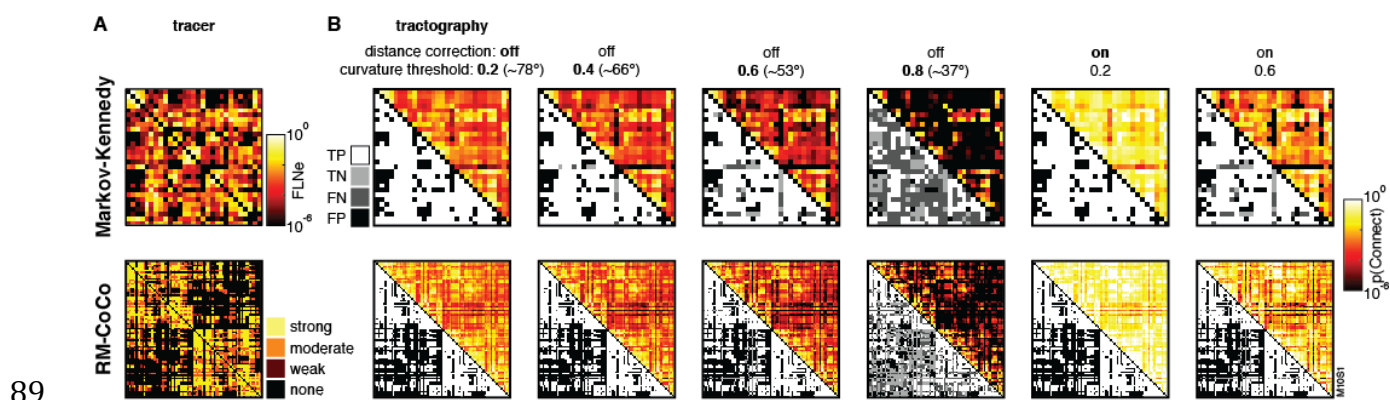

89  
90 **Figure 1.** (A) Tracer-derived connectivity matrices from Markov et al (2014) (top) and CoCoMac (Stephan et al., 2001; Shen  
91 et al., 2012) (bottom). (B) Tractography-derived matrices (upper triangle) for an example subject for each parcellation  
92 (Markov-Kennedy, top; RM-CoCo, bottom) using various tractography parameters. Accuracy of each connection, as  
93 compared to tracer-derived matrices, depicted in lower triangles (TP: true positive; TN: true negative; FN: false negative;  
94 FP: false positive). For the RM-CoCo parcellation, left hemisphere ROIs are ordered together followed by right hemisphere  
95 ROIs, such that interhemispheric quadrants are the upper right and lower left of each matrix.

## 96 ***Effects of varying tractography parameters on accuracy***

97 On the assumption that the tracer-derived networks serve as a “ground truth” for the large-scale  
98 anatomical connectivity of the macaque brain, we computed a number of accuracy measures to  
99 determine the ability for diffusion-weighted tractography to reconstruct anatomical connectivity  
100 from data collected *in vivo*. These included the percentage of connections correctly represented,  
101 the area under the ROC curve (AUC), and corresponding measures of sensitivity, specificity and  
102 precision. We first consider intrahemispheric tractography using the Markov-Kennedy  
103 parcellation. With the “default” tractography parameter combination (curvature threshold: 0.2;  
104 distance correction: off), the percentage of connections correctly represented in the tractography-  
105 derived connectivity matrices was on average 79.21% (SD: 0.32) before any thresholding was  
106 performed. The mean AUC was 0.68 (SD: 0.02), which corresponded with a very high sensitivity  
107 (M: 0.99, SD: 0.01) but very low specificity (M: 0.01, SD: 0.01). These results are in line with  
108 previous macaque studies using *ex vivo* specimens that suggested that probabilistic tractography  
109 is accurate at correctly detecting connections (Azadbakht et al., 2015) but trades off specificity for  
110 sensitivity (Thomas et al., 2014). Precision was, on average, 0.79 (SD: 0.002) for the default  
111 parameter settings indicating a high positive predictive value in DWI tractography (i.e., the great  
112 majority of positive results are true positives).

113 Curvature thresholds in tractography algorithms constrain the extent to which estimated  
114 streamlines can turn as they propagate. By default, FSL’s algorithm uses a threshold of 0.2,  
115 corresponding to  $\sim 78^\circ$ . We systematically lowered this threshold (0.4, 0.6, 0.8 or  $\sim 66^\circ$ ,  $\sim 53^\circ$ ,  
116  $\sim 37^\circ$ ) to examine its effect on the accuracy of tractography. There was an effect of curvature  
117 threshold on the percentage of correctly detected connections of the unthresholded matrices (i.e.,  
118 where the x-axis = 0, Fig. 2A; repeated measures one-way ANOVA,  $F(3, 9)=525.85$ ,  $p<0.001$ ).  
119 Notably, post hoc comparisons indicated that % correct was not significantly different between

120 matrices derived using curvature thresholds of 0.2 and 0.4 (M: 79.14%, SD: 0.12) but was  
121 significantly lower for thresholds of 0.6 (M: 76.21%, SD: 0.63) and 0.8 (M: 51.31, SD: 1.02) (Tukey-  
122 Kramer tests,  $p < 0.05$ ). The effect of curvature threshold on the AUC of unthresholded matrices  
123 was limited to differences between the lowest threshold (0.8) and all other thresholds (repeated  
124 measures one-way ANOVA,  $F(3,9)=39.83$ ,  $p<0.001$ ; post hoc Tukey-Kramer tests) (Fig. 2B).  
125 Lowering the curvature threshold to 0.6 and below resulted in a significant drop in sensitivity  
126 (repeated measures one-way ANOVA,  $F(3,9)=676.26$ ,  $p<0.001$ ; post hoc Tukey-Kramer tests) with  
127 no differences for curvature thresholds of 0.2 and 0.4 (Fig. 2C, top). This was accompanied by a  
128 significant increase specificity across all curvature thresholds (Fig. 2C, bottom; repeated measures  
129 one-way ANOVA,  $F(3,9)=530.79$ ,  $p<0.001$ ; post hoc Tukey-Kramer tests). Precision also  
130 significantly increased when the curvature threshold was lowered to 0.6 and below (repeated  
131 measures one-way ANOVA,  $F(3,9)=81.26$ ,  $p<0.001$ ; post-hoc Tukey-Kramer tests), with no  
132 pairwise differences between 0.2 and 0.4 (Fig 2D). Intrahemispheric tractography using the RM-  
133 CoCo parcellation produced similar results (Fig. S1).

### Intrahemispheric: Markov-Kennedy

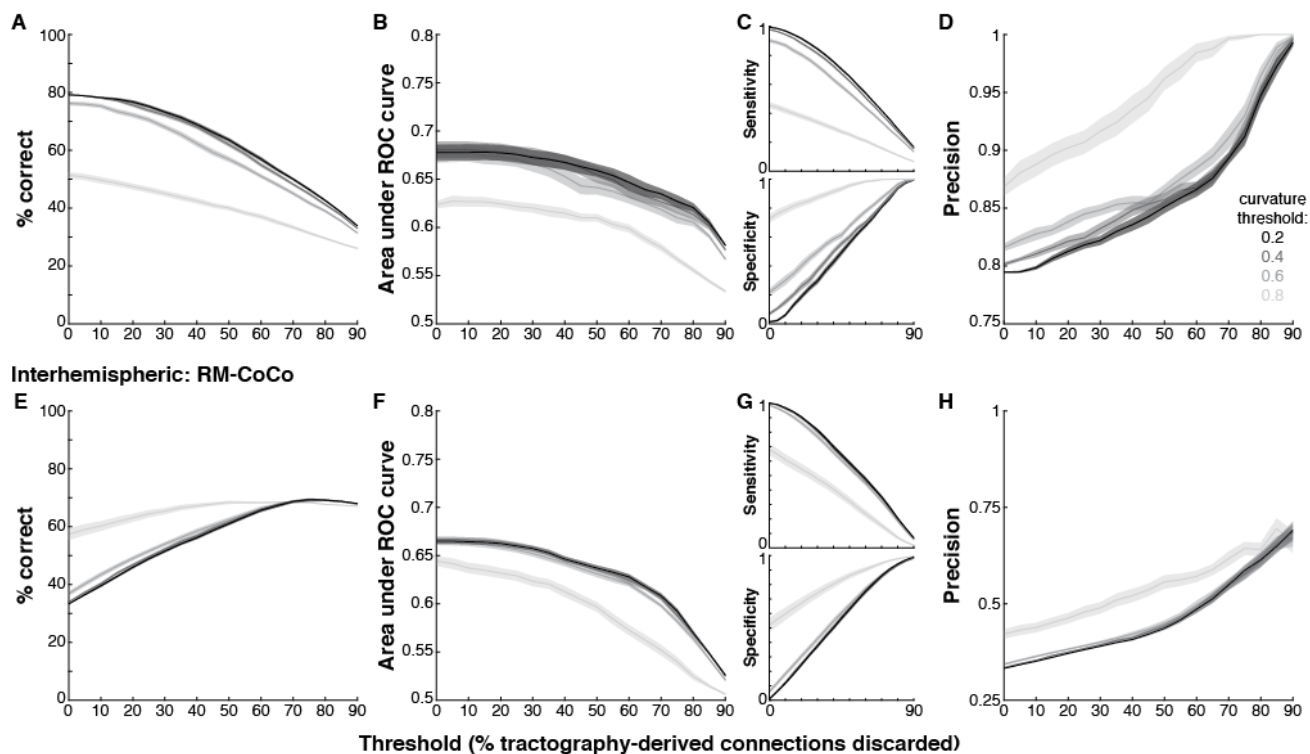

134  
135  
136  
137  
138

**Figure 2. Accuracy of DWI tractography.** (A-D) Accuracy measures for tractography using the Markov-Kennedy parcellation. (E-H) Accuracy measures for interhemispheric tractography using the RM-CoCo parcellation. Curves shown correspond to different tractography curvature thresholds as a function of thresholding the tractography-derived connectivity matrices (i.e., discarding connections having the lowest proportion of streamline counts).

139

We also explored the accuracy of interhemispheric tractography using the RM-CoCo

140

parcellation. For the ‘default’ tractography parameter settings, interhemispheric tracking resulted

141

in significantly lower % correct (paired t-test,  $t(9)=-1873.4$ ,  $p<0.0001$ ) and precision ( $t(9)=-$

142

$5636.7$ ,  $p<0.0001$ ) while AUC was not different ( $t(9)= 1.74$ ,  $p=0.12$ ) (Fig. 2E-H vs. Fig. S1).

143

However, as available tracer data for interhemispheric connections are limited, many of the

144

“absent” interhemispheric connections in the tracer matrix are due to a lack of anatomical data.

145

We therefore performed the same analysis on just the subset of interhemispheric connections for

146

which the CoCoMac database indicates an explicitly present ( $n=479$ ) or absent ( $n=125$ )

147

connection. While accuracy of tractography was remarkably better for this subset of

148

interhemispheric connections, it was still slightly lower than that of intrahemispheric

149

tractography (Fig. S2). Of note, precision for the subset analysis was considerably higher (Fig.



150 S2D) than that for all interhemispheric connections (Fig. 2H), indicating that the vast majority of  
151 detected connections in the explicit subset were true positives.

152 Just as in intrahemispheric tracking, there were no pairwise differences in % correct, AUC  
153 or precision values between curvature thresholds of 0.2 or 0.4 for interhemispheric tracking  
154 (repeated measures one-way ANOVAs, all  $p < 0.001$ ; post-hoc Tukey-Kramer tests) (Fig 2E-H).  
155 Together with the intrahemispheric tracking results, these findings suggest that using a high  
156 curvature threshold for macaque data does not result in a notable effect on the accuracy of DWI-  
157 based tractography and instead may lower the specificity when reconstructing anatomical  
158 connections across the macaque brain.

159 The ability of probabilistic tractography to reconstruct white matter fiber tracts is thought  
160 to be limited by the distance between ROIs. Factors such as noise, artifacts and actual fiber  
161 trajectory increase the uncertainty of tracking with increasing distance (Li et al., 2012). To test  
162 whether this was the case for our data, we binned connections by distance and found that %  
163 correct dropped as a function of distance for intrahemispheric tracking (Fig. S3A), consistent with  
164 previous findings for intrahemispheric tractography (Donahue et al., 2016). There was no  
165 consistent effect of distance on % correct for interhemispheric tracking (Fig. S3B). Employing  
166 distance correction did little, if anything, to change accuracy measures (data not shown), since our  
167 accuracy measures are computed using binarized data and distance correction as implemented in  
168 FSL is simply a reweighting scheme that biases the number of streamlines detected for long-  
169 distance tracts rather than whether streamlines are detectable.

170 Distance is also a determining factor in actual connectivity probabilities as observed in  
171 tracer-based networks (Markov et al., 2013; Beul et al., 2017), suggesting that the distance  
172 between ROIs could be used to estimate the existence of a connection between them. To test this,  
173 we used a simple geodesic distance-based model to generate connectivity matrices in the Markov-

174 Kennedy parcellation. Remarkably, geodesic distance-based estimates of connectivity led to better  
175 correspondence with the tracer data (median AUC: 0.75) than DWI-based reconstructions (Fig.  
176 S4).

### 177 ***Effects of discarding “weakest” connections on accuracy***

178 For the purposes of connectome creation, the outputs of probabilistic tractography algorithms are  
179 often thresholded by discarding connections whose streamline counts do not meet a minimum  
180 requirement (Zalesky et al., 2016; Roberts et al., 2017). To determine whether such a thresholding  
181 technique improves the accuracy of probabilistic tractography, we systematically thresholded our  
182 tractography-derived connectivity matrices by discarding between 5 and 90% of the “weakest”  
183 connections (i.e., those with lowest weights) in increments of 5%. Accuracy, as measured by %  
184 connections correctly detected and AUC, dropped as a function of thresholding the  
185 intrahemispheric connectivity matrix (Fig. 2A-B and S1A-B), with a significant drop occurring  
186 once 20% or more of the weakest connections were discarded, depending on the accuracy metric,  
187 parcellation and curvature threshold used (Table S1). For interhemispheric tractography, only  
188 AUC dropped as a function of discarding the weakest weights, corresponding to a drop in  
189 sensitivity (Fig. 2F-G, but see Fig. S2), with a significant drop occurring once a 35% or more was  
190 reached (Table S2).

### 191 ***Do DWI-based connectomes accurately depict network characteristics?***

192 To determine whether network characteristics were accurately captured in DWI-based  
193 connectomes, we first constructed an average DWI-based connectome for each parcellation using  
194 the set of “optimal” tractography parameters and thresholds that maximized AUC for each animal  
195 (see Methods, Fig. S5 and Table S2). We also included for analysis a DWI-based structural network  
196 in the RM-CoCo parcellation derived from control animals recently described by Grayson and

197 colleagues (2017). This independent average network was constructed using different imaging  
198 sequences, image preprocessing and probabilistic tractography procedures from those described  
199 in the present paper. For replication purposes and to examine the dependence of our results on  
200 our specific sample and DWI sequences, we present analyses on this additional DWI-based  
201 network in the supplementary materials (see Figures S6-S8).

202         The edge weights of the average DWI-based network were correlated with those from the  
203 tract-tracing one for the Markov-Kennedy parcellation (Fig 3A; Spearman rank correlation  
204 coefficient ( $r_s$ ) = 0.51,  $p < 0.0001$ ) and also for the RM-CoCo parcellation (Fig 3B;  $r_s$  = 0.45,  
205  $p < 0.0001$ ; also see Fig. S6B). This correlation is in line with (Donahue et al., 2016) or better than  
206 (van den Heuvel et al., 2015) previous studies, and suggests that the strength of a white matter  
207 fiber tract is well captured by tractography-based estimates. As distance correction biases the  
208 number of streamlines detected for long tracks, and therefore biases the weights of our DWI-  
209 based connectomes, we additionally constructed distance-corrected versions of the average DWI-  
210 based network for comparison with the tracer networks. The correlation between the  
211 tractography-based and the tract-tracing-based edge weights was worse than the correlation  
212 obtained without distance correction for both the Markov-Kennedy ( $r_s$  = 0.46,  $p < 0.0001$ ; Fig. S7A)  
213 and RM parcellation ( $r_s$  = 0.40,  $p < 0.0001$ ; Fig. S7B). Finally, because connection strength varies as  
214 a function of distance in both tracer and tractography data (e.g., Donahue et al., 2016) we also  
215 computed the partial correlation between tracer and tractography weights while controlling for  
216 distance between ROIs. The correlation between the weights was reduced by half for the Markov-  
217 Kennedy parcellation ( $r_s$  = 0.21,  $p < 0.0001$ ) but only marginally for the RM-CoCo parcellation ( $r_s$  =  
218 0.43,  $p < 0.0001$ ).

### Markov-Kennedy parcellation

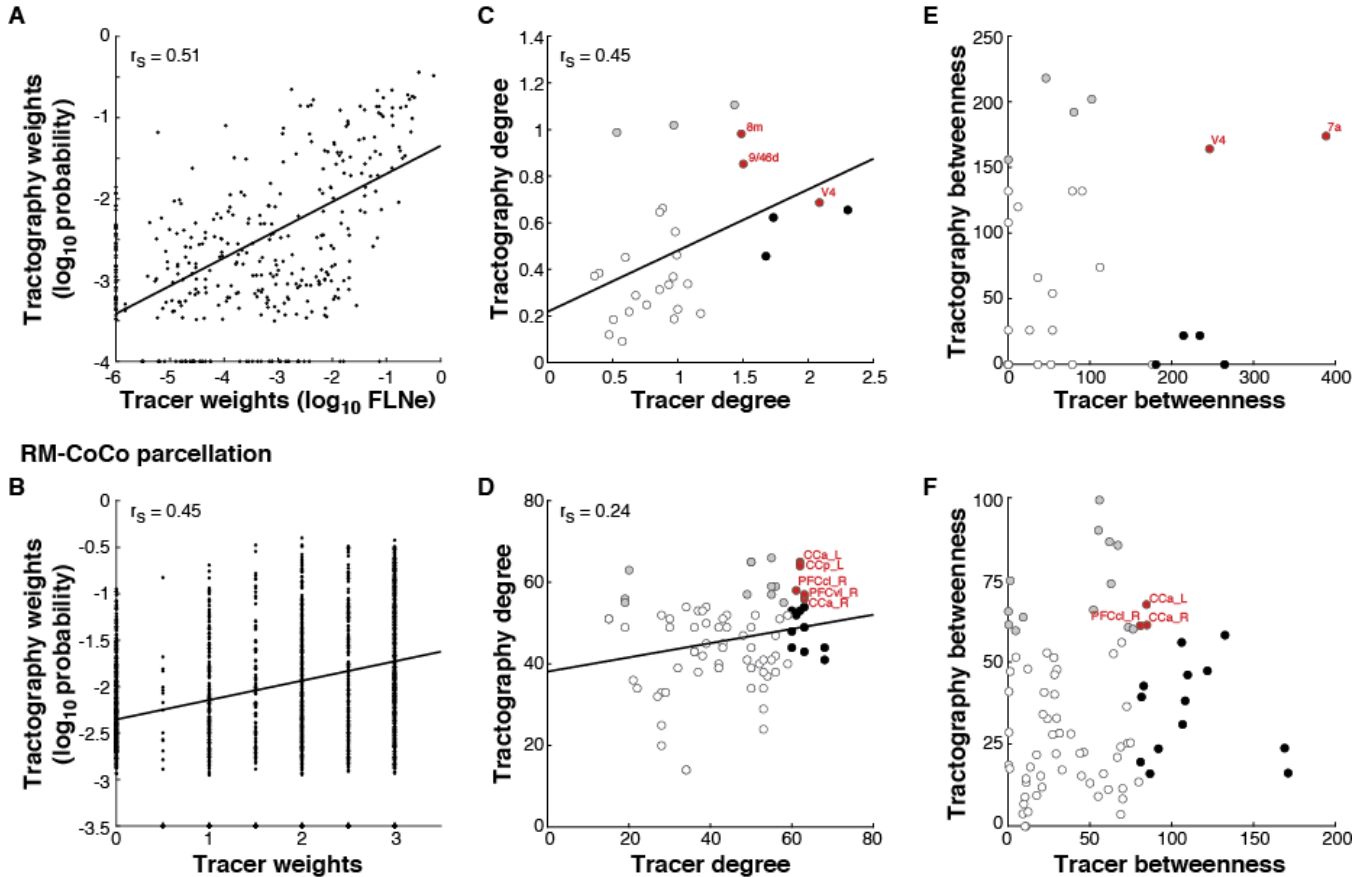

219

220

221

222

223

224

225

226

227

228

**Figure 3. Correspondence of network topology metrics of *in vivo* tractography and tract-tracing connectomes.** (A-B) Connectome weight estimates from DWI tractography are well correlated with those from tracer studies. (C-F) Centrality estimates from DWI-based networks are correlated with those from tracer studies for degree but not betweenness centrality estimates. Only some hubs, identified as those with centrality >80<sup>th</sup> percentile, in the DWI-based networks correspond with hubs in tracer-based networks (red data points). These included cortical areas 7a, 8m, 9/46d, V4 in the Markov-Kennedy parcellation (C,E), and anterior and posterior cingulate cortex (CCa and CCp) and centrolateral and ventrolateral prefrontal cortex (PFCcl and PFCvl) in the RM-CoCo parcellation (D, F). Hubs in tracer-based networks not identified as hubs in DWI-based networks denoted in black; misidentified hubs in DWI-based networks that are not hubs in tracer-based networks denoted in grey. Correctly identified hubs denoted in red.

229

We next computed a number of graph metrics that capture different levels of description of

230

topology for both tracer- and DWI-based networks to determine the extent to which tractography-

231

derived networks can accurately estimate network topology.

232

### Centrality

233

Centrality measures are commonly used to provide estimates of the extent to which each node is

234

embedded within a network, describing its potential contribution to network communication (van

235

den Heuvel and Sporns, 2013a). Figure 3 shows how the nodal degree for DWI- and tract-tracing-

236 based networks was positively correlated for the Markov-Kennedy intrahemispheric parcellation  
237 (Fig 3C;  $r_s = 0.45$ ,  $p < 0.01$ ) as well as the RM-CoCo whole brain parcellation (Fig 3D;  $r_s = 0.24$ ,  $p =$   
238  $0.01$ ). Betweenness centrality, however, was not correlated for either parcellation (Markov-  
239 Kennedy:  $r_s = 0.14$ ,  $p=0.23$ ; RM-CoCo:  $r_s =0.14$ ,  $p=0.11$ ) (also see Fig. S6C). Network “hubs” are  
240 often singled out for investigation because of the special topological role they are thought to play  
241 in network communication and are identified as those nodes with high centrality. To determine  
242 whether hubs in the tractography-based networks coincide with those in the tracer-based  
243 networks, we identified hub nodes as those having centrality values greater than the 80<sup>th</sup>  
244 percentile for each centrality measure. Although some overlap exists in the identified hubs from  
245 tractography- and tracer-based networks (Fig. 3C-F; red data points), a number of hubs in the  
246 tracer-based networks were not considered hubs in the tractography-based networks (Fig. 3C-F;  
247 black data points) and vice versa (grey data points; also see Fig. S6C-D). These findings suggest  
248 that tractography-based estimates of node centrality may not accurately reflect actual  
249 topologically central cortical regions.

## 250 ***Network architecture***

### 251 **Modularity**

252 One common way to describe brain network architecture has been to decompose brain networks  
253 into smaller communities or modules that are responsible for more specialized functions, and the  
254 connections between communities as serving the potential to integrate across these functions  
255 (Meunier et al., 2010; Sporns and Betzel, 2016). We examined whether the modular organization  
256 of tractography-based networks accurately reflected those obtained from tract tracing.  
257 Tractography-based networks showed a remarkably similar organization of subnetworks as  
258 compared to the tracer-based networks (Fig. 4A). For the Markov-Kennedy parcellation, the

259 modular organization differed only in its assignment of three nodes (F2, F5, ProM) to the  
260 prefrontal module in the tractography-based network (Fig. 4A top right, dark blue) rather than a  
261 more fronto-parietal one in the tracer-based network (Fig. 4A top left, light green). However, even  
262 in the tracer-based network, these three nodes exhibit extensive and strong connectivity with the  
263 prefrontal module (Fig. 4A top left, grey edges). For the RM-CoCo parcellation, the decomposition  
264 of the tractography-based network resulted in a fourth module (Fig. 4A, bottom right, dark blue)  
265 and the assignment of some prefrontal areas (PFCdl, FEF, PMCM, PFCvl, PMCvl) to a more  
266 prefrontal module (light blue) rather than a more fronto-parietal one as in the tracer-based  
267 network (Fig. 4A, bottom left, light green). We determined the distance between the two sets of  
268 modules by computing the variation of information (VI) between them (Meilă, 2007). For both  
269 parcellations, the VI was significantly lower between the tractography-based partitions and the  
270 tracer-based ones as compared to the tracer-based null networks (Markov-Kennedy:  $0.13$  vs  $0.70$   
271  $\pm 4.2 \times 10^{-15}$ ; RM-CoCo:  $0.27$  vs  $0.35 \pm 3.0 \times 10^{-15}$ ), suggesting that the tractography- and tracer-based  
272 partitions were more similar to each other than expected by chance.

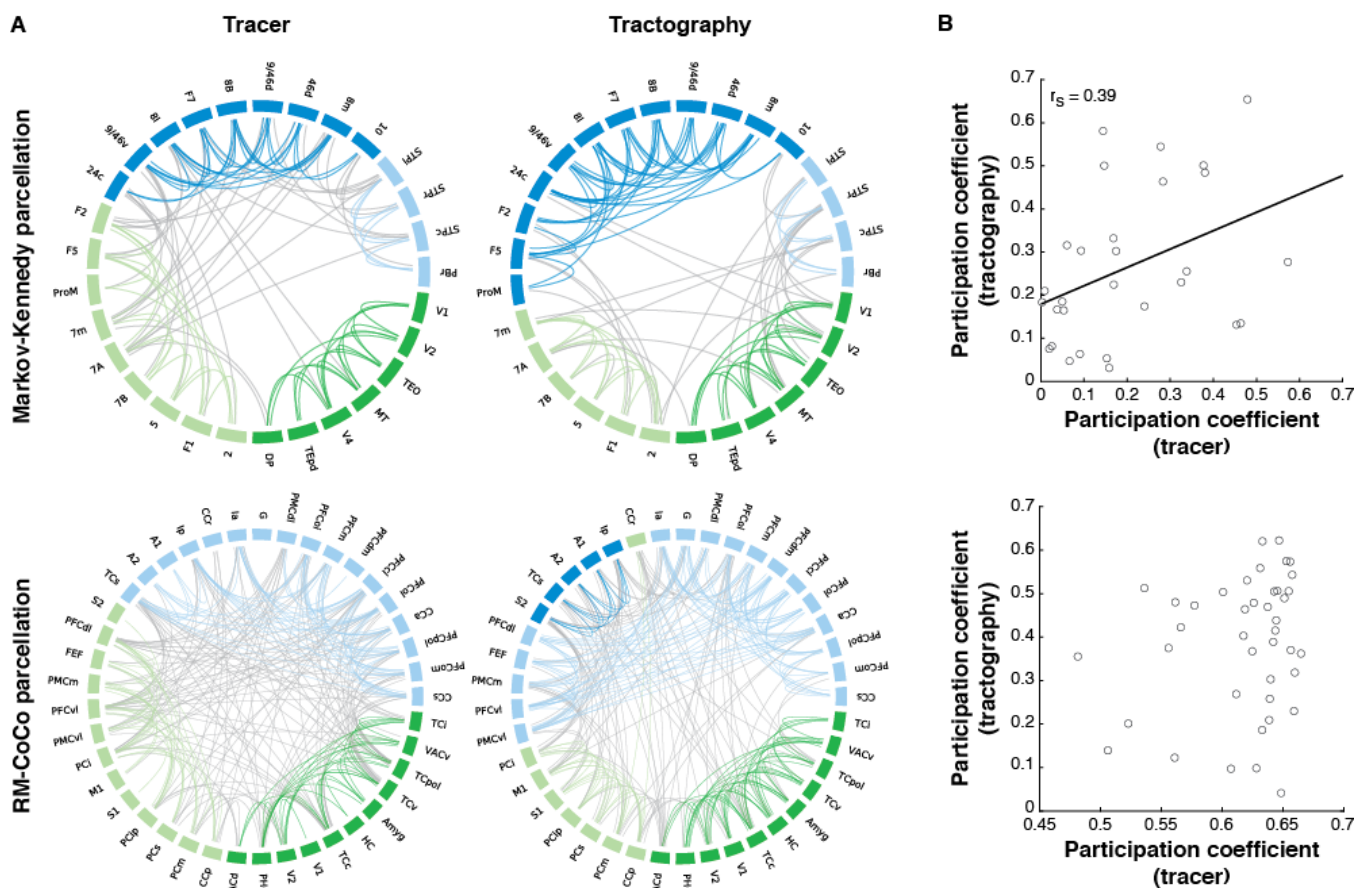

273

274 **Figure 4. Modularity partitions of tractography-based networks are well matched with those from tracer-based**  
 275 **networks.** (A) Connectogram depictions of modular structure of each network type for the Markov-Kennedy (top) and the  
 276 RM-CoCo (bottom) parcellations. Community assignments are denoted by node color. Within-module edges are denoted  
 277 with the same color as the module while between-module edges are denoted in gray. Edges were thresholded for ease of  
 278 visualization. For the Markov-Kennedy parcellation, the visualization threshold was set to 33% for both network types. For  
 279 RM-Coco, the visualization threshold was set to keep connections in the strongest weight category (i.e., 3) in the tracer-  
 280 based network and the tractography-based network was matched for the number of edges. (B) Correlation between  
 281 tractography- and tracer-based network participation coefficients for the Markov-Kennedy (top) and RM-CoCo (bottom)  
 282 parcellations. The community assignment of tracer-based networks were imposed on the tractography-based networks to  
 283 determine participation coefficients.

284 We also assessed the accuracy of the tractography-based networks community  
 285 assignments by first imposing the community structure of the tracer-based networks on the  
 286 tractography-based ones and then computing the participation coefficients for each of the nodes  
 287 in the tractography-based networks. The participation coefficient describes the extent to which  
 288 each node is connected to nodes in other modules. If the “true” community assignments and, in  
 289 particular, the between-module distribution of connections from the tracer-based networks were  
 290 well estimated by the topology of the tractography-based networks, then the participation

291 coefficients of the tractography-based network nodes computed in this manner should match  
292 those from the tracer-based networks. There was a moderate match for the Markov-Kennedy  
293 parcellation (Fig. 4B;  $r_s = 0.39$ ,  $p=0.02$ , Spearman rank correlation) but not for the RM-CoCo  
294 parcellation (Fig. 4B;  $r_s = 0.03$ ,  $p=0.42$ ; also see Fig. S8). Together with the observed low VI  
295 between partition lists, these results suggest that nodal community assignments are well  
296 represented by DWI-based connectomes and the distribution of connections between and within  
297 modules can, to some degree, be estimated as well.

### 298 **Rich Club Architecture**

299 Brain networks have also been described as having a so-called “rich club” architecture, whereby a  
300 subset of high degree nodes exhibit dense connectivity with each other, often poised to mediate  
301 intermodular communication and forming a strong anatomical core (van den Heuvel and Sporns,  
302 2013b). We examined whether a rich club architecture could be detected in the tracer-based  
303 networks, and the extent to which the tractography-based networks were able to replicate such  
304 findings. As our networks were weighted, we computed the normalized rich club coefficient by  
305 considering network weights in addition to topology when generating the null models (Alstott et  
306 al., 2014) for both of the tractography-based networks as well as the Markov-Kennedy tracer  
307 network. Similar to previous findings (Knoblauch et al., 2016), the Markov-Kennedy tracer  
308 network approached a rich club architecture at a degree of 24 ( $p = 0.08$  for weighted networks,  $p$   
309  $= 0.06$  for mixed networks) but rich club architecture was not consistently detected across a range  
310 of degrees and by and large not significant for any of the types of network considered (Fig. 6A,  
311 left). Although the DWI-based Markov-Kennedy network showed an increase in the normalized  
312 rich club coefficient at high degree levels, none were significantly greater than 1 following FDR  
313 correction (Fig. 5A, right). As we have previously reported (Shen et al., 2015), the RM-CoCo tracer  
314 network exhibits a rich club architecture at multiple degree levels (Fig. 5B, left). The DWI-based



315 RM-CoCo network also exhibits a rich club architecture at multiple degree levels for all three types  
316 of models considered (Fig. 5B, right). A hypergeometric test of significant rich club levels detected  
317 in this network when a mixed model was considered showed significant overlap with the tracer  
318 network in 3 of 14 levels (at  $k=55$ ,  $p<0.01$ ; at  $k=54$ ,  $p=0.01$ ; and at  $k=53$ ,  $p=0.03$ ; also see Fig. S9).  
319 For level  $k=55$ , 10 rich club hubs that included regions of the prefrontal and cingulate cortex were  
320 identified in both the tracer- and DWI-based networks (Fig. 5C; red). Some additional regions of  
321 the temporal cortex along with dorso-medial prefrontal cortex were RC hubs in the DWI-based  
322 network but not the tracer-based one (Fig. 5C; grey), while a number of parietal and prefrontal RC  
323 hubs of the tracer-based network were notably missing from the DWI-based network (Fig. 5C;  
324 black).

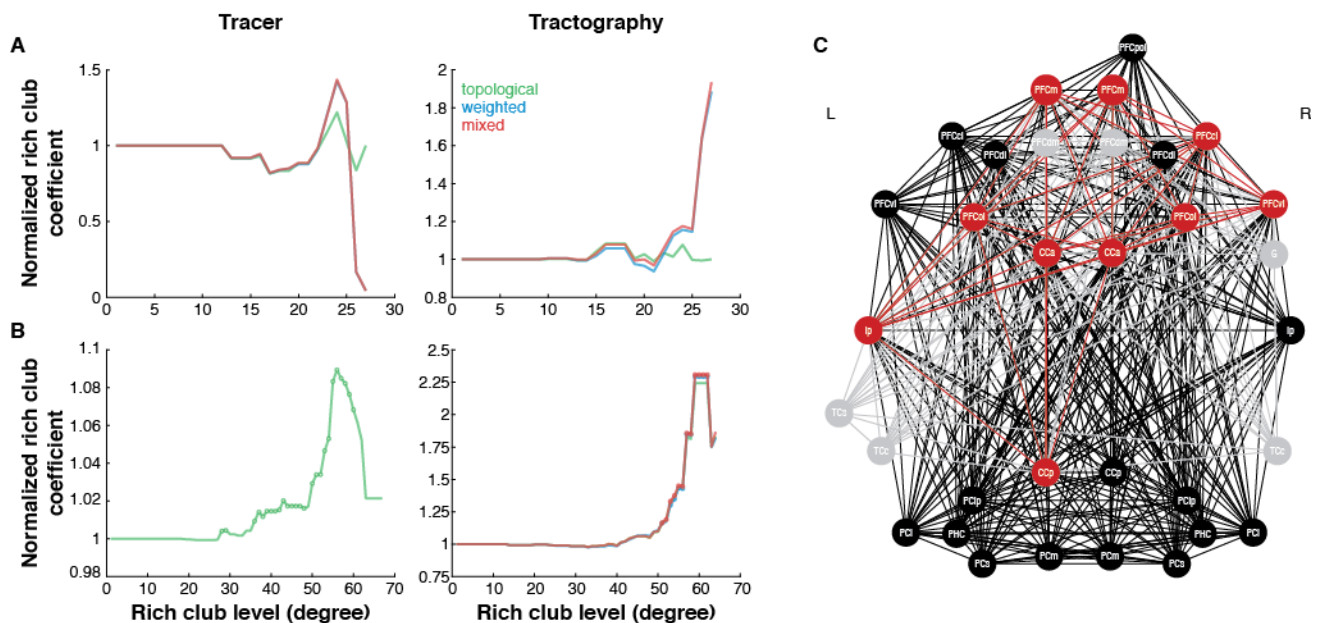

325 **Figure 5. Rich club (RC) architecture in tracer- and DWI-based networks.** Normalized rich club coefficient for tracer- (left)  
326 and DWI-based (right) networks for the Markov-Kennedy (A) and RM-CoCo (B) parcellations. RC levels (i.e., normalized rich  
327 club coefficients significantly  $>1$ ) denoted by circles. (C) RCs at degree level 55 for RM-CoCo parcellation. Red nodes and  
328 edges depict those that are common to both tracer- and DWI-based networks. RC nodes and edges incorrectly detected by  
329 DWI are depicted in grey, and those in tracer-based networks but missed by DWI are depicted in black.

### 331 Core-Periphery Architecture

332 For denser networks, such as the Markov-Kennedy tracer one, a core-periphery architecture has  
333 been described (Ercsey-Ravasz et al., 2013). Here, we determined whether the core-periphery

334 architecture previously reported in the Markov-Kennedy tracer network can be reconstructed by  
335 tractography-based connectomes. For the symmetrized tracer-based network, we detected a set of  
336 18 nodes that contributed to the high-density core, with the 11 remaining nodes considered to be  
337 in the periphery (Fig. 6A). For the tractography-based network, a core-periphery architecture was  
338 also detected, with the core consisting of 21 nodes, of which 16 were correctly identified (Fig. 6B).  
339 A hypergeometric test showed significant overlap in the core memberships of the tracer and  
340 tractography networks ( $p < 0.001$ ).

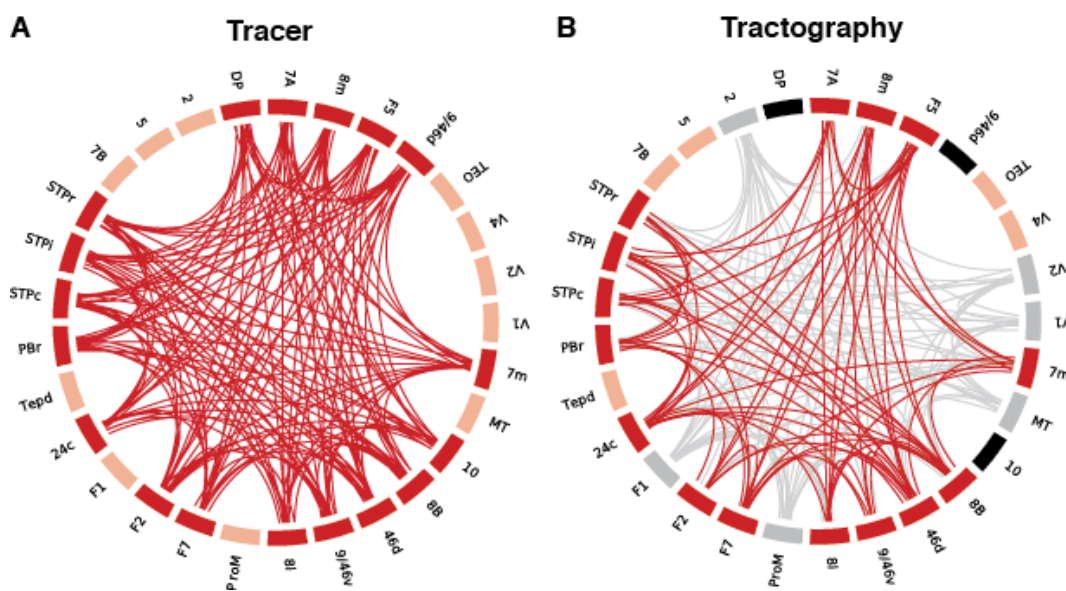

341

342 **Figure 6. Core-Periphery architecture in tracer- and DWI-based networks.** (A) Core-periphery architecture detected in  
343 Markov-Kennedy tract tracing network. Core nodes and edges depicted in red, peripheral nodes depicted in coral. (B)  
344 Core-periphery architecture detected in the tractography-based network. Correctly identified core nodes and edges in red,  
345 peripheral nodes in coral. Incorrectly identified core nodes and edges depicted in grey, while core nodes that were missed  
346 depicted in black.

## 347 Discussion

348 We have tested the performance of *in vivo* diffusion and tractography-based connectomes by  
349 comparing them to the gold standard connectomes from tracer data in macaque monkeys. We  
350 found that the reconstruction of individual connections to be moderately accurate, with a steep  
351 tradeoff between sensitivity and specificity that replicates previous *ex vivo* reports. We also found  
352 the proportion of streamlines detected between any two given regions can serve as a robust

353 estimate of the number of axons that run between them, and that this relationship was dependent  
354 on the distance between regions. Importantly, we performed a series of validation studies on  
355 network topology metrics and demonstrated how the assignment of nodes into communities in  
356 tractography-based connectomes is fairly accurate and that a high-density rich club or core-  
357 periphery organization can be detected, just as they can be in the corresponding tracer-based  
358 networks. However, the proper identification of hubs within modules, and membership in rich  
359 club or core-periphery type architectures was less accurate, likely owing to the great number of  
360 false positive connections generated by tractography. As network analysis has quickly become a  
361 popular approach for analyzing cortical connectomes, leading to the influential and expanding  
362 fields of connectomics and network neuroscience (Sporns, 2013; Bassett and Sporns, 2017), our  
363 findings are instrumental for the interpretation of network topology results based on *in vivo*  
364 measurements of structural connectivity.

### 365 **Reconstruction of interareal cortico-cortical connections *in vivo***

366 Mapping the cortical connectome and uncovering its topological layout is a major ongoing  
367 research endeavour, involving many large-scale efforts like the Human Connectome Project (Van  
368 Essen et al., 2013). Structural connectomes *in vivo* can only be constructed with diffusion weighted  
369 imaging and tractography at present. The majority of such approaches aim to reconstruct the  
370 large-scale cortico-cortical connectivity matrix and subsequently analyze it using network metrics  
371 (Bassett et al., 2008; Hagmann et al., 2008; Gong et al., 2009). Here, we found the reconstruction of  
372 connections between the cortical areas to be above chance, but not highly accurate. Our obtained  
373 quantitative measures, such as AUC, are comparable to recent reports investigating  
374 intrahemispheric connections (Thomas et al., 2014; Azadbakht et al., 2015; van den Heuvel et al.,  
375 2015; Donahue et al., 2016). Our results provide additional quantitative evidence on the feasibility  
376 to correctly uncover the correct pairs of interconnected areas with diffusion imaging and

377 tractography, by using two different benchmark datasets obtained by tract tracing. Despite large  
378 differences in how these two benchmark datasets were derived, how their connectivity was  
379 expressed and how they have differing network topologies, intrahemispheric tractography results  
380 for these two parcellations were remarkably similar. Importantly, we also examined  
381 interhemispheric tractography and show that it exhibits worse reconstruction quality than  
382 intrahemispheric tractography. This is consistent with our observation that tractography accuracy  
383 decreases with increasing distance between regions (also see Li et al., 2012; Donahue et al., 2016),  
384 which is only compounded when tracking across hemispheres. However, when we limited our  
385 analysis to only those interhemispheric connections that were explicitly defined in CoCoMac, the  
386 accuracy of DWI tractography approached that of intrahemispheric tracking. Precision, in  
387 particular, was considerably higher for this subset analysis, suggesting that the false positive rate  
388 decreased dramatically when we only considered explicitly defined connections. This suggests  
389 that, to some degree, missing information in CoCoMac about interhemispheric connections may be  
390 lowering our estimates of DWI tractography accuracy. Moreover, although considered the “gold  
391 standard”, tracer data themselves are not perfect and can be affected by variability across  
392 individual injections, the uptake of tracers by passing axonal fibers, as well as the distance  
393 travelled by particular tracers (for discussion, see Köbbert et al., 2000; Lanciego and Wouterlood,  
394 2011; Markov et al., 2014).

395       Earlier validation studies have highlighted the inability of tractography to resolve long-  
396 range connections. Both probabilistic (Li et al., 2012) and deterministic (Dauguet et al., 2007;  
397 Zalesky and Fornito, 2009) tractography algorithms suffer from false negatives associated with  
398 long-range fibers due to the increasing uncertainty of tractography with distance (Jbabdi et al.,  
399 2015). Simply biasing connection weights towards long-distance connections using the distance  
400 correction option did little to resolve this problem as accuracy measures relied on the binary

401 classification of the existence or non-existence of connections (but see Azadbakht et al., 2015).  
402 Instead, implementing the distance correction option affected the ability of tractography to  
403 estimate the strength of connections, decreasing it substantially when distance was estimated  
404 with the more realistic measure of geodesic distance rather than Euclidean distance. Connectomes  
405 constructed using deterministic tractography are generally more sparse than those constructed  
406 using probabilistic tractography (Zalesky et al., 2016), and can suffer from a large number of false  
407 negative connections (Gong et al., 2009; Bastiani et al., 2012). Recent reports of probabilistic  
408 tractography, including the results presented here, have additionally indicated that while the  
409 majority of 'true connections' are successfully reconstructed, they instead come at the price of a  
410 large number of false positive connections (e.g., Thomas et al., 2014). The choice between  
411 deterministic and probabilistic tractography then, can be considered as a choice between  
412 constructing low-sensitivity/high-specificity connectomes versus high-sensitivity/low-specificity  
413 ones. Relevant for the probabilistic tractography results presented here, excessive false positive  
414 connections have been reported as a major drawback of diffusion imaging and tractography in a  
415 validation study with simulated human brain data (Maier-Hein et al., 2017). These findings, along  
416 with the observation that false positives have a much larger impact on estimates of network  
417 topology as compared to false negatives (Bastiani et al., 2012; Zalesky et al., 2016), should be  
418 explicitly taken into account as important limitations when interpreting results from diffusion  
419 imaging tractography. Our results indicate that thresholding the weakest weights in the  
420 tractography-based networks on the order of 20-30% did not affect the percentage of correctly  
421 detected connections. Moreover, thresholding on the order of 55-85% did not affect AUC as it  
422 decreased sensitivity while dramatically increasing specificity. This is consistent with previous  
423 estimates for optimizing the tradeoff between sensitivity and specificity (de Reus and van den  
424 Heuvel, 2013b; Donahue et al., 2016). Choosing to threshold by discarding the weakest weights,

425 however, may result in also discarding weak true positives. Weak connections are known to be  
426 important in determining the brain's functional organization (Gallos et al., 2012; Goulas et al.,  
427 2015) and may be better represented in networks that have been constructed using methods that  
428 take the frequency of edge reconstruction across subjects into account (Roberts et al., 2017). We  
429 also found that lower curvature thresholds, at least for macaque data, result in fewer false  
430 positives and greater specificity without greatly affecting other accuracy measures (also see  
431 Dauguet et al., 2007; Azadbakht et al., 2015). Whether this is a result of less cortical folding and,  
432 therefore, less convoluted white matter pathways in the macaque brain (Herculano-Houzel et al.,  
433 2010; Zilles et al., 2013) or whether it constitutes an indicative guide for human tractography  
434 remains to be seen.

435 Using the streamline count as a proxy of fiber density has been previously criticized  
436 because it is susceptible to differences in tract lengths, curvature and branching (Jones, 2010;  
437 Jones et al., 2013). However, we showed how the probability values obtained with tractography  
438 were significantly correlated with an explained variance in line with Donahue et al. (2016), and  
439 nearly twice that of van den Heuvel et al. (2015). Since it is clear from tracer studies that physical  
440 distance plays a large role in the existence and strength of connections (Markov et al., 2013; Beul  
441 et al., 2017), a cautionary note is needed when interpreting such validation results. We have  
442 shown that a model based on physical distance alone was able to achieve comparable and even  
443 higher AUC than the diffusion and tractography-based reconstructions. Moreover, the correlation  
444 between the strength of connections and the tractography probabilities was diminished when  
445 physical distance was taken into account. Physical distance-based models (e.g., Ercsey-Ravasz et  
446 al., 2013; Bezgin et al., 2017) may therefore offer a more stringent baseline than using  
447 tractography alone while advancements in both imaging and tractography methods are still  
448 needed for the accurate reconstruction of cortical connectomes *in vivo*.

## 449 **Investigating network topology of the cortex *in vivo***

450 The success of some network metrics but not others in the tractography-based connectomes was  
451 dependent on their resilience to rewirings. We found the partitioning of the cortico-cortical  
452 network into modules to be highly similar between the invasive and non-invasive connectivity  
453 datasets. These results bestow some confidence in module partitioning results obtained *in vivo*.  
454 This is in line with recent work that showed how false negatives, and even false positives, in  
455 connectomes affect modularity partitioning minimally (Zalesky et al., 2016). Partitioning brain  
456 networks into modules can result in variable communities across iterations (Sporns and Betzel,  
457 2016). To minimize the effects of unstable partitionings, we chose to use the most consistent  
458 community structure detected from multiple iterations of partitioning. Additional work is still  
459 needed to fully assess how the accuracy of partitioning affects comparisons of modularity between  
460 different networks.

461 The participation coefficient, a higher-order network metric commonly used to identify  
462 intra-modular “provincial” and inter-modular “connector” hubs based on their cross-modular  
463 edges, was not consistent across the invasive and non-invasive datasets. Our results suggested  
464 that for the Markov-Kennedy parcellation, inaccuracies mostly arose from the reconstruction of  
465 inter- and intra-modular connections as the participation coefficients were correlated even when  
466 we controlled for differences in community structure by keeping the partitioning scheme fixed  
467 when computing participation coefficients. For the RM-CoCo parcellation, however, there was an  
468 additional cost from the slightly inaccurate classification of nodes into their respective  
469 communities. Indeed, two networks can have extremely similar modularity partitions but their  
470 underlying connections could be statistically independent.

471 The susceptibility of centrality measures to rewirings resulted in discrepancies between  
472 the results obtained from the invasive and non-invasive measurements. While for degree

473 centrality a significant positive correlation was observed, no significant correlations were  
474 observed for betweenness centrality in our dataset and only moderate correlations in a second  
475 dataset (see Supplemental Material). The top most connected nodes or “hubs” between the two  
476 modalities also did not fully overlap when using either centrality metric. Our results indicate that  
477 more confidence can be assigned to degree as compared to betweenness centrality when non-  
478 invasive measurements are used. Along similar lines, global descriptions of structural organization  
479 like rich-club or core-periphery architectures, if they existed in the tract tracing networks, could  
480 be obtained from the tractography-based networks. However, the particular identification of  
481 nodes as hubs within these architectures was less accurate, owing again to the susceptibility of the  
482 identification to rewirings. Taken together, these results suggest that caution must be taken when  
483 using DWI-based tractography for identifying hubs, as identification is extremely susceptible to  
484 false connections.



## 485 **Materials and Methods**

486 Data were collected from 10 male adult macaque monkeys (9 *Macaca mulatta*, 1 *Macaca*  
487 *fascicularis*, age  $5.8 \pm 1.9$  years). A subset of these animals (N=3) had MRI-compatible dental  
488 acrylic implants anchored to the skull with ceramic bone screws. All surgical and experimental  
489 procedures were approved by the Animal Use Subcommittee of the University of Western Ontario  
490 Council on Animal Care and were in accordance with the Canadian Council of Animal Care  
491 guidelines.

492 Surgical preparation and anaesthesia protocols have been previously described (Hutchison  
493 et al 2011). Briefly, animals were anaesthetized before their scanning session and anaesthesia was  
494 maintained using 1.5-2.0% isoflurane during image acquisition. Images were acquired using a 7-T  
495 Siemens MAGNETOM head scanner with a high performance gradient (Siemens AC84 II;  $G_{max} =$   
496  $80 \text{ mT/m}$ ;  $SlewRate = 400 \text{ T/m/s}$  and an in-house designed and manufactured 8-channel transmit,  
497 24-channel receive coil optimized for the primate head. For each monkey, two diffusion weighted  
498 scans were acquired with opposite phase encoding in the superior-inferior direction at 1 mm  
499 isotropic resolution. For seven animals data was acquired 2D EPI diffusion (Siemens Advanced  
500 Diffusion WIP 511) with  $TE/TR = 48.8 \text{ ms} / 7500 \text{ ms}$ ,  $b = 1000 \text{ s/mm}^2$ , 64 directions,  $104 \times 104$   
501 matrix, 24 slices,  $iPat = 3$  and bandwidth of  $1923 \text{ Hz/px}$ . For the remaining 3 animals, a multiband  
502 EPI diffusion sequence (Feinberg et al., 2010; Moeller et al., 2010) was used;  $TE/TR = 47 \text{ ms} /$   
503  $6000 \text{ ms}$ , multiband =2,  $b = 1000 \text{ s/mm}^2$ , 64 directions,  $128 \times 128$  matrix, 24 slices,  $iPat = 2$ , Partial  
504 fourier =  $5/8$  and bandwidth of  $1502 \text{ Hz/px}$ . A 3D T1w structural reference was collected for all  
505 animals using an MP2RAGE (Marques et al., 2010) acquisition at 500 um isotropic resolution;  
506  $TE/TR = 3.15 \text{ ms} / 6500 \text{ ms}$ ,  $TI1/TI2 = 800 \text{ ms} / 2700 \text{ ms}$ ,  $flip1/flip2 = 4 / 5$ ,  $256 \times 256$  matrix,  
507 128 slices,  $iPat=2$  and  $240 \text{ Hz/px}$  bandwidth.

508 Diffusion-weighted image preprocessing was implemented using the FMRIB Software  
509 Library toolbox (FSL v5). This consisted of susceptibility-induced distortion correction using FSL's  
510 'topup' (similar to Andersson et al., 2003) and 'eddy' (Andersson and Sotiropoulos, 2016)  
511 functions, and modeling of multiple fiber directions using FSL's 'bedpostx' function (Behrens et al.,  
512 2007). ROI parcellations specified in F99 macaque template space were registered using the  
513 Advanced Normalization Tools (ANTs) software package (Avants et al., 2011) to each animal's  
514 T1w anatomical image using a nonlinear registration and then linearly registered to diffusion  
515 space. Seed and target ROI masks were defined as the white matter (WM) voxels adjacent to each  
516 gray matter (GM) ROI, referred to as the GM-WM interface. An exclusion mask for each seed mask  
517 was also created using the GM voxels adjacent to the seed mask. For intrahemispheric tracking,  
518 exclusion masks of the opposite hemisphere were also used.

519 Two distinct parcellation schemes were chosen to match available tract-tracing data. The  
520 first ('Markov-Kennedy') was an intrahemispheric parcellation of 29 ROIs that matched those  
521 contributing to the edge-complete connectivity matrix described in Markov et al (2014) (Fig 1A,  
522 top). The second ("CoCo-RM") was a whole-cortex parcellation of 82 ROIs matching the  
523 connectivity matrix described in Shen et al. (2012) (also see Kötter and Wanke, 2005) (Fig 1A,  
524 bottom).

525 Tractography was performed between all ROIs using both parcellation schemes with FSL's  
526 'probtrackx2' function. Parameters used for tracking were: 5000 seeds, 2000 steps, 0.5 mm step  
527 length, termination of paths that loop back on themselves and rejection of paths that pass through  
528 exclusion mask. Curvature threshold was varied (0.2, 0.4, 0.6, 0.8) and distance correction was  
529 toggled on and off. The distance correction option produces a connectivity distribution that is the  
530 expected length of the streamlines that cross the voxel multiplied by the number of samples that  
531 cross it. In effect, the distance correction option serves to increase the weights of long-distance

532 connections. The “default” parameter combination was considered as that commonly used in  
533 human studies (curvature threshold: 0.2; distance correction: off).

534 A structural connectivity matrix for each parameter set in each parcellation in each animal  
535 was generated by taking the number of streamlines detected between each ROI pair and dividing  
536 it by the total number of streamlines that were successfully sent from the seed mask (i.e., those  
537 that were not rejected or excluded). Each connectivity matrix was subsequently symmetrized.

538 For distance-based analyses, the distance between ROIs in the Markov-Kennedy  
539 parcellation was determined as the geodesic distance of their barycenters, that is, the shortest  
540 distance passing through the white matter that connects the barycenters of a pair of areas (as  
541 available from the Core-Nets database: [core-nets.org](http://core-nets.org)). The distance between ROIs in the RM-CoCO  
542 parcellation was computed as the Euclidean distance between the centers of all ROIs. For both  
543 parcellations, connections were binned according to eight distance quantiles for analysis.

544 For determining accuracy of the DWI-based structural connectivity matrices (i.e., analyses  
545 illustrated in Fig. 2), the corresponding tracer matrices were symmetrized (Fig 1A) and all  
546 matrices were binarized. % correct was computed as: # true positives + # true negatives / total #  
547 connections (after Azadbakht et al., 2015). We additionally computed the area under the ROC  
548 curve (AUC), sensitivity, specificity, and precision of the DWI-derived matrices. Comparisons were  
549 only performed on the upper triangles of matrices. Repeated measures one-way ANOVAs were  
550 performed to assess the effect of curvature threshold on accuracy, treating the curvature  
551 thresholds as four manipulations on the same group of subjects.

552 To quantify the extent to which physical distance can predict the existence of connections  
553 between cortical areas, logistic regression was used, with the existence of connections serving as  
554 the binary dependent variable and the physical geodesic distance between the barycenters of  
555 cortical areas serving as the independent variable. The model parameters were estimated in a

556 training set consisting of 70% of the total number of area pairs and the rest of the pairs were used  
557 to estimate the ROC curve. The procedure was repeated 1000 times and each time the training set  
558 was assembled by sampling with replacement. The reported ROC curves and AUC values  
559 correspond to these 1000 iterations.

560 For network analyses, average DWI-based structural connectivity matrices for both the  
561 Markov-Kennedy and RM-CoCo parcellations were generated by selecting, for each subject, the  
562 matrix having maximum AUC when compared to the tract-tracing data. The combination of  
563 tractography parameters and thresholding that yielded the maximum AUC for each subject in each  
564 parcellation is provided in Table S2. To enable direct comparison of tracer- and tractography-  
565 based networks, tracer matrices were symmetrized. Consequently, network analytic results  
566 presented here on the tracer matrices differ slightly from previous studies (e.g., Ercsey-Ravasz et  
567 al 2013; Knoblauch et al chapter on RC; Shen et al 2012; Shen et al 2015 RC). Tractography-based  
568 networks were then thresholded to match the density of the corresponding tracer-derived  
569 networks. In the case of the RM-CoCo parcellation, intra- and interhemispheric quadrants of the  
570 tractography-based network were treated with different thresholds due to their vast differences  
571 in density in the tract-tracing network (intra: 0.84 vs inter: 0.36). For the Markov-Kennedy  
572 parcellation, edges in both tracer- and tractography-based networks were treated as weighted.  
573 For the RM-CoCo parcellation, because of the categorical nature of the weighted information in the  
574 CoCoMac database, edges were binarized for the tracer-based network as well as the  
575 tractography-based network for computing centrality measures (degree and betweenness).

576 Measures of centrality, modularity partitioning and participation coefficients were  
577 obtained using functions from the Brain Connectivity Toolbox (BCT; <https://sites.google.com/site/bctnet/>). For weighted graphs, the degree of each node was computed as the sum of its  
578 edge weights while for binarized graphs, node degree was taken as the total number of its edges.  
579

580 For the calculation of betweenness centrality, the edge weights were inverted so that larger  
581 weights corresponded with longer paths. Community detection was performed using the Louvain  
582 algorithm (Blondel et al., 2008). As we did not know how the small network of 29 nodes from the  
583 Markov-Kennedy parcellation should be partitioned, we first varied the resolution parameter  
584 ( $\gamma$ ) between 0 and 2 in increments of 0.05 and determined the most commonly detected  
585 number of partitions  $>1$  in that range. The minimum value of  $\gamma$  that produced that number  
586 of partitions was selected. For the RM-CoCo parcellation, we similarly varied the resolution  
587 parameter but selected a  $\gamma$  value that gave a reasonable number of partitions based on  
588 previous studies of whole-brain modularity in the macaque (Harriger et al., 2012; Goulas et al.,  
589 2015). Partitioning for both parcellations was then repeated 100 times using the selected  $\gamma$   
590 value, and the most consistent partitioning was chosen for analysis. This was done independently  
591 for both tracer- and tractography-based networks. For the Markov-Kennedy parcellation  
592 partitions, both tracer ( $\gamma = 0.65$ ) and tractography ( $\gamma = 0.65$ ) networks were  
593 consistently partitioned 100/100 times. For the RM-CoCo parcellation, the most common partition  
594 of the tracer network ( $\gamma = 1$ ) occurred 17/100 times while that of the tractography network  
595 ( $\gamma = 0.95$ ) occurred 44/100 times. Spearman rank correlation coefficients were computed to  
596 assess the correspondence of network measures between the two modalities. Statistical  
597 significance of the correlations was assessed using permutation tests by resampling data pairs  
598 without replacement 10,000 times.

599 Rich club detection was performed following the procedures described by Alstott et al.  
600 (2014) for computing null networks that are topological, weighted, and of mixed topo-weighted  
601 form. Core-periphery detection was performed as described in Ercszey-Ravasz et al (2013).  
602 Briefly, the cortico-cortical network was subject to a modified Bron-Kerbosch algorithm with both  
603 pivoting and degeneracy ordering (Eppstein et al., 2010). The algorithm detects all cliques up to

604 the maximum size. A clique is a subset of the nodes of the network among which the maximum  
605 possible amount of connections exists. The core was defined as the union of all the nodes  
606 participating in the cliques of maximum size.

## 607 **Acknowledgements**

608 This work was supported by a grant from the Canadian Institutes of Health Research (CIHR) (S.E.)  
609 and the J. S. McDonnell Foundation (A.R.M.).

## 610 **References**

- 611 Alstott J, Panzarasa P, Rubinov M, Bullmore ET, Vértés PE (2014) A unifying framework for  
612 measuring weighted rich clubs. *Sci Rep* 4:7258.
- 613 Andersson JLR, Skare S, Ashburner J (2003) How to correct susceptibility distortions in spin-echo  
614 echo-planar images: application to diffusion tensor imaging. *Neuroimage* 20:870–888.
- 615 Andersson JLR, Sotiropoulos SN (2016) An integrated approach to correction for off-resonance  
616 effects and subject movement in diffusion MR imaging. *Neuroimage* 125:1063–1078.
- 617 Avants BB, Tustison NJ, Song G, Cook PA, Klein A, Gee JC (2011) A reproducible evaluation of ANTs  
618 similarity metric performance in brain image registration. *Neuroimage* 54:2033–2044.
- 619 Azadbakht H, Parkes LM, Haroon HA, Augath M, Logothetis NK, De Crespigny A, D’Arceuil HE,  
620 Parker GJM (2015) Validation of high-resolution tractography against in Vivo tracing in the  
621 macaque visual cortex. *Cereb Cortex* 25:4299–4309.
- 622 Bassett DS, Bullmore E, Verchinski BA, Mattay VS, Weinberger DR, Meyer-Lindenberg A (2008)  
623 Hierarchical Organization of Human Cortical Networks in Health and Schizophrenia. *J*  
624 *Neurosci* 28.
- 625 Bassett DS, Sporns O (2017) Network neuroscience. *Nat Neurosci* 20:353–364.
- 626 Bastiani M, Shah NJ, Goebel R, Roebroek A (2012) Human cortical connectome reconstruction  
627 from diffusion weighted MRI: The effect of tractography algorithm. *Neuroimage* 62:1732–  
628 1749.
- 629 Baum GL, Ciric R, Roalf DR, Betzel RF, Moore TM, Shinohara RT, Kahn AE, Vandekar SN, Rupert PE,  
630 Quarmley M, Cook PA, Elliott MA, Ruparel K, Gur RE, Gur RC, Bassett DS, Satterthwaite TD  
631 (2017) Modular Segregation of Structural Brain Networks Supports the Development of  
632 Executive Function in Youth. *Curr Biol* 27:1561–1572.e8.
- 633 Behrens TEJ, Berg HJ, Jbabdi S, Rushworth MFS, Woolrich MW (2007) Probabilistic diffusion

- 634 tractography with multiple fibre orientations: What can we gain? *Neuroimage* 34:144–155.
- 635 Beul SF, Barbas H, Hilgetag CC (2017) A Predictive Structural Model of the Primate Connectome.  
636 *Sci Rep* 7:43176.
- 637 Bezgin G, Solodkin A, Bakker R, Ritter P, McIntosh AR (2017) Mapping complementary features of  
638 cross-species structural connectivity to construct realistic “Virtual Brains.” *Hum Brain Mapp*  
639 38:2080–2093.
- 640 Bezgin G, Vakorin VA, van Opstal AJ, McIntosh AR, Bakker R (2012) Hundreds of brain maps in one  
641 atlas: registering coordinate-independent primate neuro-anatomical data to a standard brain.  
642 *Neuroimage* 62:67–76.
- 643 Blondel VD, Guillaume J-L, Lambiotte R, Lefebvre E (2008) Fast unfolding of communities in large  
644 networks. *J Stat Mech Theory Exp* 2008:P10008.
- 645 Crossley NA, Mechelli A, Scott J, Carletti F, Fox PT, McGuire P, Bullmore ET (2014) The hubs of the  
646 human connectome are generally implicated in the anatomy of brain disorders. *Brain*  
647 137:2382–2395.
- 648 Dauguet J, Peled S, Berezovskii V, Delzescaux T, Warfield SK, Born R, Westin CF (2007)  
649 Comparison of fiber tracts derived from in-vivo DTI tractography with 3D histological neural  
650 tract tracer reconstruction on a macaque brain. *Neuroimage* 37:530–538.
- 651 de Reus MA, van den Heuvel MP (2013a) Rich Club Organization and Intermodule Communication  
652 in the Cat Connectome. *J Neurosci* 33:12929–12939.
- 653 de Reus MA, van den Heuvel MP (2013b) Estimating false positives and negatives in brain  
654 networks. *Neuroimage* 70:402–409.
- 655 Donahue CJ, Sotiropoulos SN, Jbabdi S, Hernandez-Fernandez M, Behrens TE, Dyrby TB, Coalson T,  
656 Kennedy H, Knoblauch K, Van Essen DC, Glasser MF (2016) Using Diffusion Tractography to  
657 Predict Cortical Connection Strength and Distance: A Quantitative Comparison with Tracers



- 658 in the Monkey. *J Neurosci* 36:6758–6770.
- 659 Eppstein D, Löffler M, Strash D (2010) Listing All Maximal Cliques in Sparse Graphs in Near-  
660 optimal Time.
- 661 Ercsey-Ravasz M, Markov NT, Lamy C, VanEssen DC, Knoblauch K, Toroczkai Z, Kennedy H (2013)  
662 A Predictive Network Model of Cerebral Cortical Connectivity Based on a Distance Rule.  
663 *Neuron* 80:184–197.
- 664 Feinberg DA, Moeller S, Smith SM, Auerbach E, Ramanna S, Glasser MF, Miller KL, Ugurbil K,  
665 Yacoub E (2010) Multiplexed echo planar imaging for sub-second whole brain fmri and fast  
666 diffusion imaging. *PLoS One* 5.
- 667 Fornito A, Zalesky A, Breakspear M (2015) The connectomics of brain disorders. *Nat Rev Neurosci*  
668 16:159–172.
- 669 Gallos LK, Makse HA, Sigman M (2012) A small world of weak ties provides optimal global  
670 integration of self-similar modules in functional brain networks. *Proc Natl Acad Sci U S A*  
671 109:2825–2830.
- 672 Gong G, He Y, Concha L, Lebel C, Gross DW, Evans AC, Beaulieu C (2009) Mapping Anatomical  
673 Connectivity Patterns of Human Cerebral Cortex Using In Vivo Diffusion Tensor Imaging  
674 Tractography. *Cereb Cortex* 19:524–536.
- 675 Goulas A, Schaefer A, Margulies DS (2015) The strength of weak connections in the macaque  
676 cortico-cortical network. *Brain Struct Funct* 220:2939–2951.
- 677 Grayson DS, Bliss-Moreau E, Bennett J, Lavenex P, Amaral DG (2017) Neural Reorganization Due to  
678 Neonatal Amygdala Lesions in the Rhesus Monkey: Changes in Morphology and Network  
679 Structure. *Cereb Cortex* 53:1–14.
- 680 Griffa A, Baumann PS, Thiran JP, Hagmann P (2013) Structural connectomics in brain diseases.  
681 *Neuroimage* 80:515–526.

- 682 Haggmann P, Cammoun L, Gigandet X, Meuli R, Honey CJ, Wedeen VJ, Sporns O (2008) Mapping the  
683 structural core of human cerebral cortex. *PLoS Biol* 6:e159.
- 684 Harriger L, van den Heuvel MP, Sporns O (2012) Rich club organization of macaque cerebral  
685 cortex and its role in network communication. *PLoS One* 7:e46497.
- 686 Herculano-Houzel S, Mota B, Wong P, Kaas JH (2010) Connectivity-driven white matter scaling and  
687 folding in primate cerebral cortex. *Proc Natl Acad Sci U S A* 107:19008–19013.
- 688 Jbabdi S, Sotiropoulos SN, Haber SN, Van Essen DC, Behrens TE (2015) Measuring macroscopic  
689 brain connections in vivo. *Nat Neurosci* 18:1546–1555.
- 690 Jones D (2010) Challenges and limitations of quantifying brain connectivity in vivo with diffusion  
691 MRI. *Imaging Med* 2:341–355.
- 692 Jones DK, Knösche TR, Turner R (2013) White matter integrity, fiber count, and other fallacies:  
693 The do's and don'ts of diffusion MRI. *Neuroimage* 73.
- 694 Knoblauch K, Ercsey-ravasz M, Kennedy H, Toroczkai Z (2016) The Brain in Space. In: Micro-,  
695 meso- and macro- connectomics of the brain (Kennedy H, Van Essen DC, Christen Y, eds), pp  
696 45–74.
- 697 Köbbert C, Apps R, Bechmann I, Lanciego JL, Mey J, Thanos S (2000) Current concepts in  
698 neuroanatomical tracing. *Prog Neurobiol* 62:327–351.
- 699 Kötter R, Wanke E (2005) Mapping brains without coordinates. *Philos Trans R Soc Lond B Biol Sci*  
700 360:751–766.
- 701 Lanciego JL, Wouterlood FG (2011) A half century of experimental neuroanatomical tracing. *J*  
702 *Chem Neuroanat* 42:157–183.
- 703 Li L, Rilling JK, Preuss TM, Glasser MF, Hu X (2012) The effects of connection reconstruction  
704 method on the interregional connectivity of brain networks via diffusion tractography. *Hum*  
705 *Brain Mapp* 33:1894–1913.

- 706 Maier-Hein KH et al. (2017) The challenge of mapping the human connectome based on diffusion  
707 tractography. *Nat Commun* 8:1349.
- 708 Markov NT et al. (2014) A weighted and directed interareal connectivity matrix for macaque  
709 cerebral cortex. *Cereb Cortex* 24:17–36.
- 710 Markov NT, Ercsey-Ravasz M, Lamy C, Ribeiro Gomes AR, Magrou L, Misery P, Giroud P, Barone P,  
711 Dehay C, Toroczkai Z, Knoblauch K, Van Essen DC, Kennedy H (2013) The role of long-range  
712 connections on the specificity of the macaque interareal cortical network. *Proc Natl Acad Sci*  
713 U S A 110:5187–5192.
- 714 Marques JP, Kober T, Krueger G, van der Zwaag W, Van de Moortele PF, Gruetter R (2010)  
715 MP2RAGE, a self bias-field corrected sequence for improved segmentation and T1-mapping at  
716 high field. *Neuroimage* 49:1271–1281.
- 717 Meilă M (2007) Comparing clusterings-an information based distance. *J Multivar Anal* 98:873–  
718 895.
- 719 Meunier D, Lambiotte R, Bullmore ET (2010) Modular and hierarchically modular organization of  
720 brain networks. *Front Neurosci* 4:1–11.
- 721 Moeller S, Yacoub E, Olman CA, Auerbach E, Strupp J, Harel N, Uğurbil K (2010) Multiband  
722 multislice GE-EPI at 7 tesla, with 16-fold acceleration using partial parallel imaging with  
723 application to high spatial and temporal whole-brain FMRI. *Magn Reson Med* 63:1144–1153.
- 724 Park H-J, Friston K (2013) Structural and functional brain networks: from connections to  
725 cognition. *Science* 342:1238411.
- 726 Perry A, Wen W, Lord A, Thalamuthu A, Roberts G, Mitchell PB, Sachdev PS, Breakspear M (2015)  
727 The organisation of the elderly connectome. *Neuroimage* 114:414–426.
- 728 Roberts JA, Perry A, Roberts G, Mitchell PB, Breakspear M (2017) Consistency-based thresholding  
729 of the human connectome. *Neuroimage* 145:118–129.

- 730 Shen K, Bezgin G, Hutchison RM, Gati JS, Menon RS, Everling S, McIntosh AR (2012) Information  
731 processing architecture of functionally defined clusters in the macaque cortex. *J Neurosci*  
732 32:17465–17476.
- 733 Shen K, Hutchison RM, Bezgin G, Everling S, McIntosh AR (2015) Network structure shapes  
734 spontaneous functional connectivity dynamics. *J Neurosci* 35:5579–5588.
- 735 Sporns O (2013) The human connectome: Origins and challenges. *Neuroimage* 80:53–61.
- 736 Sporns O (2014) Contributions and challenges for network models in cognitive neuroscience. *Nat*  
737 *Neurosci* 17:652–660.
- 738 Sporns O, Betzel RF (2016) Modular Brain Networks. *Annu Rev Psychol* 67:613–640.
- 739 Stephan KE, Kamper L, Bozkurt A, Burns G, Young M, Kötter R (2001) Advanced database  
740 methodology for the Collation of Connectivity data on the Macaque brain (CoCoMac). *Philos*  
741 *Trans R Soc Lond B Biol Sci* 356:1159–1186.
- 742 Thomas C, Ye FQ, Irfanoglu MO, Modi P, Saleem KS, Leopold DA, Pierpaoli C (2014) Anatomical  
743 accuracy of brain connections derived from diffusion MRI tractography is inherently limited.  
744 *Proc Natl Acad Sci U S A* 111:16574–16579.
- 745 van den Heuvel MP, de Reus MA, Feldman Barrett L, Scholtens LH, Coopmans FMT, Schmidt R,  
746 Preuss TM, Rilling JK, Li L (2015) Comparison of diffusion tractography and tract-tracing  
747 measures of connectivity strength in rhesus macaque connectome. *Hum Brain Mapp*  
748 36:3064–3075.
- 749 van den Heuvel MP, Mandl RCW, Stam CJ, Kahn RS, Hulshoff Pol HE (2010) Aberrant Frontal and  
750 Temporal Complex Network Structure in Schizophrenia: A Graph Theoretical Analysis. *J*  
751 *Neurosci* 30.
- 752 van den Heuvel MP, Sporns O (2011) Rich-Club Organization of the Human Connectome. *J*  
753 *Neurosci* 31:15775–15786.

- 754 van den Heuvel MP, Sporns O (2013a) Network hubs in the human brain. *Trends Cogn Sci* 17:683–  
755 696.
- 756 van den Heuvel MP, Sporns O (2013b) An anatomical substrate for integration among functional  
757 networks in human cortex. *J Neurosci* 33:14489–14500.
- 758 Van Essen DC, Smith SM, Barch DM, Behrens TEJ, Yacoub E, Ugurbil K, WU-Minn HCP Consortium  
759 (2013) The WU-Minn Human Connectome Project: An overview. *Neuroimage* 80:62–79.
- 760 Zalesky A, Fornito A (2009) A DTI-Derived Measure of Cortico-Cortical Connectivity. 28:1023–  
761 1036.
- 762 Zalesky A, Fornito A, Cocchi L, Gollo LL, van den Heuvel MP, Breakspear M (2016) Connectome  
763 sensitivity or specificity: which is more important? *Neuroimage* 142:407–420.
- 764 Zalesky A, Fornito A, Seal ML, Cocchi L, Westin C-F, Bullmore ET, Egan GF, Pantelis C (2011)  
765 Disrupted Axonal Fiber Connectivity in Schizophrenia. *Biol Psychiatry* 69:80–89.
- 766 Zilles K, Palomero-Gallagher N, Amunts K (2013) Development of cortical folding during evolution  
767 and ontogeny. *Trends Neurosci* 36:275–284.
- 768 Zuo X-N, He Y, Betzel RF, Colcombe S, Sporns O, Milham MP (2016) Human Connectomics across  
769 the Life Span. *Trends Cogn Sci* xx:1–14.
- 770
